# Supplementary material for: Factors Affecting SARS-CoV-2 IgG Production after Vaccination and/or Disease: A Large-Scale Seroprevalence Study
Source: MDPI journal article supplement (doi:10.3390/vaccines11101615), 2023-10-19
Supplement: s1 [file s1]

## Table of contents

|                                                                                                                                             |   |
|---------------------------------------------------------------------------------------------------------------------------------------------|---|
| Figure S1 Comparison of the antibody titer based on categorization of COVID-19 severity                                                     | 2 |
| Table S1 Descriptive statistics of figures 2a, b, c, and 3a, b                                                                              | 2 |
| Figure S2 Analysis of the time span in weeks passed between vaccination and blood drawing comparing 1x, 2x, 3x, and 4x vaccinated subgroups | 3 |
| Table S2 Analysis of the time span in weeks passed between the date of vaccination and blood drawing                                        | 4 |
| Figure S3 Analysis of the time span in weeks passed between vaccination and blood drawing comparing vaccination combinations                | 5 |
| Figure S4 Monitoring the antibody titer over time                                                                                           | 5 |
| Figure S5 Antibody titer (BAU/ml) of the various disease types within the 3x vaccinated and convalescent group                              | 6 |
| Table S3 Pairwise comparison of chronic diseases in the 3x vaccinated and convalescent group                                                | 6 |

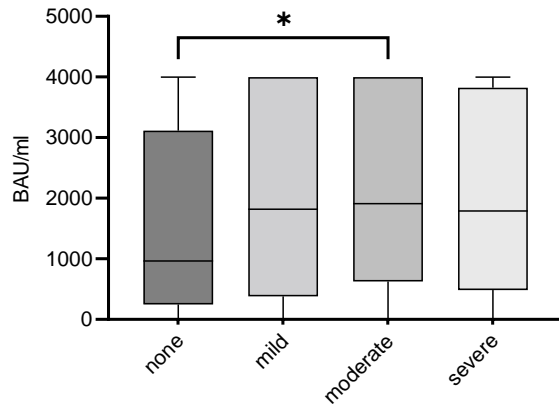

**Figure S1.** Comparison of the antibody titer based on categorization of COVID-19 severity. Antibody titer (BAU/ml) is compared between subjects with no symptoms, mild-, moderate-, and severe- symptoms. \* p-value < 0.05

**Table S1** Descriptive statistics of figures 2a, b, c, and 3a, b.

|                                 |                  |                  |                         |                 |                         |                  |                | 95% CI of median            |                                 |                                 |
|---------------------------------|------------------|------------------|-------------------------|-----------------|-------------------------|------------------|----------------|-----------------------------|---------------------------------|---------------------------------|
|                                 | Number of values | Minimum (BAU/ml) | 25% Percentile (BAU/ml) | Median (BAU/ml) | 75% Percentile (BAU/ml) | Maximum (BAU/ml) | Range (BAU/ml) | Actual confidence level (%) | Lower confidence limit (BAU/ml) | Upper confidence limit (BAU/ml) |
| <b>Figure 2a</b>                |                  |                  |                         |                 |                         |                  |                |                             |                                 |                                 |
| vacc. <sup>1</sup>              | 1106             | 0.00             | 367.80                  | 770.50          | 2070.00                 | 4000.00          | 4000.00        | 95.00                       | 711.00                          | 835.00                          |
| vacc.+conv. <sup>2</sup>        | 686              | 0.00             | 1268.00                 | 3020.00         | 4000.00                 | 4000.00          | 4000.00        | 95.71                       | 2610.00                         | 3730.00                         |
| conv.                           | 208              | 0.00             | 12.38                   | 65.60           | 228.80                  | 4000.00          | 4000.00        | 95.59                       | 39.10                           | 100.00                          |
| <b>Figure 2b</b>                |                  |                  |                         |                 |                         |                  |                |                             |                                 |                                 |
| 2x vacc.                        | 150              | 0.00             | 138.30                  | 361.50          | 953.30                  | 4000.00          | 4000.00        | 95.91                       | 261.00                          | 524.00                          |
| 3x vacc.                        | 952              | 40.50            | 416.00                  | 835.50          | 2230.00                 | 4000.00          | 3960.00        | 95.20                       | 772.00                          | 914.00                          |
| 4x vacc.                        | 3                | 648.00           | 648.00                  | 1110.00         | 4000.00                 | 4000.00          | 3352.00        | 75.00                       | 648.00                          | 4000.00                         |
| <b>Figure 2c</b>                |                  |                  |                         |                 |                         |                  |                |                             |                                 |                                 |
| 1x vacc.                        | 57               | 154.00           | 661.50                  | 1270.00         | 2435.00                 | 4000.00          | 3846.00        | 96.69                       | 856.00                          | 1780.00                         |
| 2x vacc.                        | 177              | 0.00             | 986.00                  | 1980.00         | 4000.00                 | 4000.00          | 4000.00        | 96.50                       | 1600.00                         | 2730.00                         |
| 3x vacc.                        | 453              | 15.00            | 1610.00                 | 4000.00         | 4000.00                 | 4000.00          | 3985.00        | 95.17                       | 3610.00                         | 4000.00                         |
| <b>Figure 3a</b>                |                  |                  |                         |                 |                         |                  |                |                             |                                 |                                 |
| 3x Vax. <sup>3</sup>            | 2                | 104.00           | 104.00                  | 304.50          | 505.00                  | 505.00           | 401.00         | 50.00                       | 104.00                          | 505.00                          |
| 2x Vax. + 1x Com. <sup>4</sup>  | 299              | 55.90            | 318.00                  | 595.00          | 1210.00                 | 4000.00          | 3944.00        | 95.09                       | 530.00                          | 672.00                          |
| 2x Vax. + 1x Spik. <sup>5</sup> | 8                | 218.00           | 492.50                  | 786.00          | 3490.00                 | 4000.00          | 3782.00        | 99.22                       | 218.00                          | 4000.00                         |

|                       |     |         |         |         |         |         |         |       |         |         |
|-----------------------|-----|---------|---------|---------|---------|---------|---------|-------|---------|---------|
| 1x Vax. +<br>2x Com.  | 15  | 70.90   | 366.00  | 459.00  | 1010.00 | 4000.00 | 3929.00 | 96.48 | 366.00  | 1010.00 |
| 1x Vax. +<br>2x Spik. | 5   | 208.00  | 259.50  | 546.00  | 2460.00 | 4000.00 | 3792.00 | 93.75 | 208.00  | 4000.00 |
| 3x Com.               | 444 | 40.50   | 423.00  | 831.50  | 2515.00 | 4000.00 | 3960.00 | 95.88 | 747.00  | 956.00  |
| 2x Com. +<br>1x Spik. | 12  | 594.00  | 807.00  | 2115.00 | 4000.00 | 4000.00 | 3406.00 | 96.14 | 762.00  | 4000.00 |
| 3x Spik.              | 70  | 192.00  | 951.50  | 1855.00 | 4000.00 | 4000.00 | 3808.00 | 95.86 | 1220.00 | 3630.00 |
| 2x Spik. +<br>1x Com. | 92  | 140.00  | 862.50  | 1780.00 | 4000.00 | 4000.00 | 3860.00 | 95.30 | 1410.00 | 2790.00 |
| <b>Figure 3b</b>      |     |         |         |         |         |         |         |       |         |         |
| 3x Vax.               | 1   | 4000.00 | 4000.00 | 4000.00 | 4000.00 | 4000.00 | 0.00    | 5.00  |         |         |
| 2x Vax. +<br>1x Com.  | 142 | 248.00  | 1198.00 | 2100.00 | 4000.00 | 4000.00 | 3752.00 | 96.45 | 1740.00 | 2720.00 |
| 2x Vax. +<br>1x Spik. | 6   | 1010.00 | 1460.00 | 2315.00 | 4000.00 | 4000.00 | 2990.00 | 96.88 | 1010.00 | 4000.00 |
| 1x Vax. +<br>2x Com.  | 5   | 646.00  | 978.00  | 4000.00 | 4000.00 | 4000.00 | 3354.00 | 93.75 | 646.00  | 4000.00 |
| 3x Com.               | 242 | 15.00   | 2105.00 | 4000.00 | 4000.00 | 4000.00 | 3985.00 | 95.39 | 4000.00 | 4000.00 |
| 2x Com. +<br>1x Spik. | 2   | 2810.00 | 2810.00 | 3405.00 | 4000.00 | 4000.00 | 1190.00 | 50.00 | 2810.00 | 4000.00 |
| 3x Spik.              | 27  | 634.00  | 2250.00 | 4000.00 | 4000.00 | 4000.00 | 3366.00 | 98.08 | 2260.00 | 4000.00 |
| 2x Spik. +<br>1x Com. | 27  | 356.00  | 2650.00 | 4000.00 | 4000.00 | 4000.00 | 3644.00 | 98.08 | 2890.00 | 4000.00 |

<sup>1</sup> vacc.=vaccinated, <sup>2</sup> conv.=convalescent, <sup>3</sup> Vax.=Vaxzevria, <sup>4</sup> Com.=Comirnaty, <sup>5</sup> Spik.=Spikevax

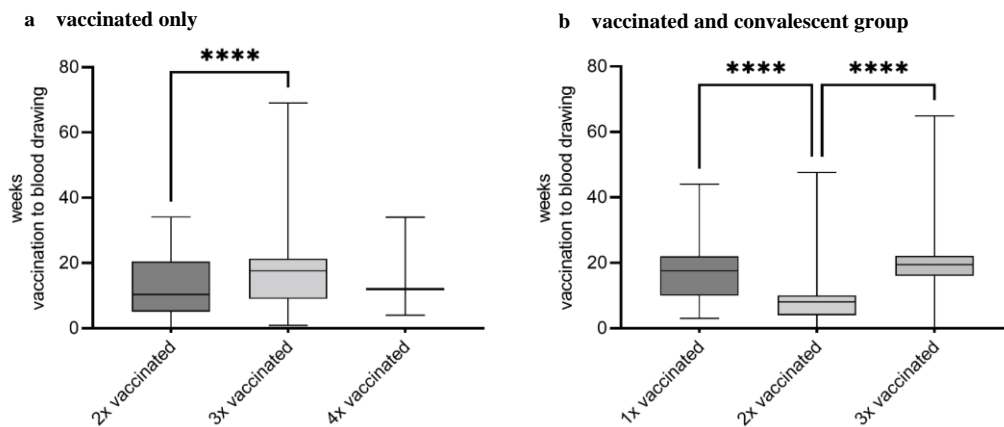

**Figure S2.** Analysis of the time span in weeks passed between vaccination and blood drawing comparing 1x, 2x, 3x, and 4x vaccinated subgroups. Within the (a) vaccinated only and (b) hybrid immunized group, the weeks passed between vaccination date and date of blood drawing are depicted for the number of vaccinations. \*\*\*\* p-value < 0.0001

**Table S2.** Analysis of the time span in weeks passed between the date of vaccination and blood drawing. Statistical analyses using descriptive analysis and Kruskal Wallis test with Post-hoc analysis were performed within the (a) vaccinated only and (b) hybrid immunized group comparing 1x, 2x, 3x, and 4x vaccinated subgroups.

**a) Vaccinated only subgroup**

|            |    | Weeks after 2 <sup>nd</sup> vaccination | Weeks after 3 <sup>rd</sup> vaccination | Weeks after 4 <sup>th</sup> vaccination |
|------------|----|-----------------------------------------|-----------------------------------------|-----------------------------------------|
| Median     |    | 10.4                                    | 17.6                                    | 12.0                                    |
| Minimum    |    | 0.1                                     | 0.9                                     | 4.0                                     |
| Maximum    |    | 34.1                                    | 69.0                                    | 34.0                                    |
| Percentile | 25 | 5.1                                     | 9.0                                     | 4.0                                     |
|            | 50 | 10.4                                    | 17.6                                    | 12.0                                    |
|            | 75 | 20.5                                    | 21.3                                    | 34.0                                    |

|                                                                                     |                 |
|-------------------------------------------------------------------------------------|-----------------|
| Kruskal Wallis                                                                      | P-value < 0.000 |
| Pairwise comparison with Bonferroni correction:                                     |                 |
| Weeks after 2 <sup>nd</sup> vaccination vs. Weeks after 3 <sup>rd</sup> vaccination | 0.000           |
| Weeks after 2 <sup>nd</sup> vaccination vs. Weeks after 4 <sup>th</sup> vaccination | 1.000           |
| Weeks after 3 <sup>rd</sup> vaccination vs. Weeks after 4 <sup>th</sup> vaccination | 1.000           |

**b) Vaccinated and convalescent subgroup**

|            |    | Weeks after 1 <sup>st</sup> vaccination | Weeks after 2 <sup>nd</sup> vaccination | Weeks after 3 <sup>rd</sup> vaccination |
|------------|----|-----------------------------------------|-----------------------------------------|-----------------------------------------|
| Median     |    | 20.7                                    | 8.0                                     | 19.4                                    |
| Minimum    |    | 4.1                                     | 0.0                                     | 0.0                                     |
| Maximum    |    | 45.7                                    | 47.6                                    | 64.9                                    |
| Percentile | 25 | 13.7                                    | 4.0                                     | 16.0                                    |
|            | 50 | 20.7                                    | 8.0                                     | 19.4                                    |
|            | 75 | 24.1                                    | 10.0                                    | 22.1                                    |

|                                                                                     |                 |
|-------------------------------------------------------------------------------------|-----------------|
| Kruskal Wallis                                                                      | P-value < 0.000 |
| Pairwise comparison with Bonferroni correction:                                     |                 |
| Weeks after 1 <sup>st</sup> vaccination vs. Weeks after 2 <sup>nd</sup> vaccination | 0.000           |
| Weeks after 2 <sup>nd</sup> vaccination vs. Weeks after 3 <sup>rd</sup> vaccination | 0.000           |
| Weeks after 1 <sup>st</sup> vaccination vs. Weeks after 3 <sup>rd</sup> vaccination | 1.000           |

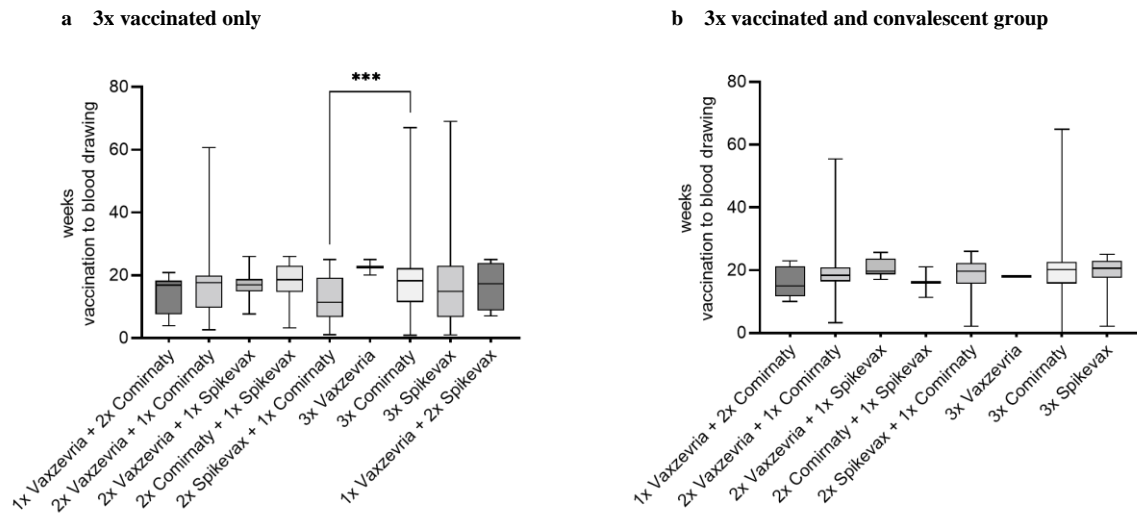

**Figure S3.** Analysis of the time span in weeks passed between vaccination and blood drawing comparing vaccination combinations. Within the (a) 3x vaccinated only and (b) hybrid immunized group, the weeks passed between vaccination date and date of blood drawing are depicted for the vaccination combinations. \*\*\* p-value < 0.001

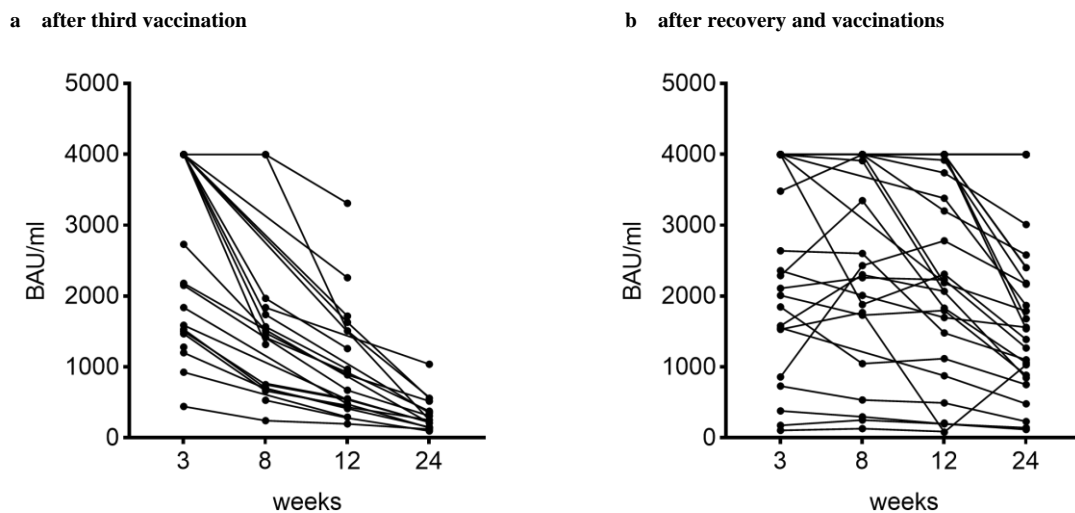

**Figure S4.** Monitoring the antibody titer over time. Antibody level was determined over a period of 24 weeks at four different timepoints (3, 8, 12, and 24 weeks) in subjects after (a) third vaccination only and (b) recovery and previous vaccinations. Kruskal-Wallis test with Dunn's post hoc test. \*\*\* p-value < 0.001, \*\*\*\* p-value < 0.0001

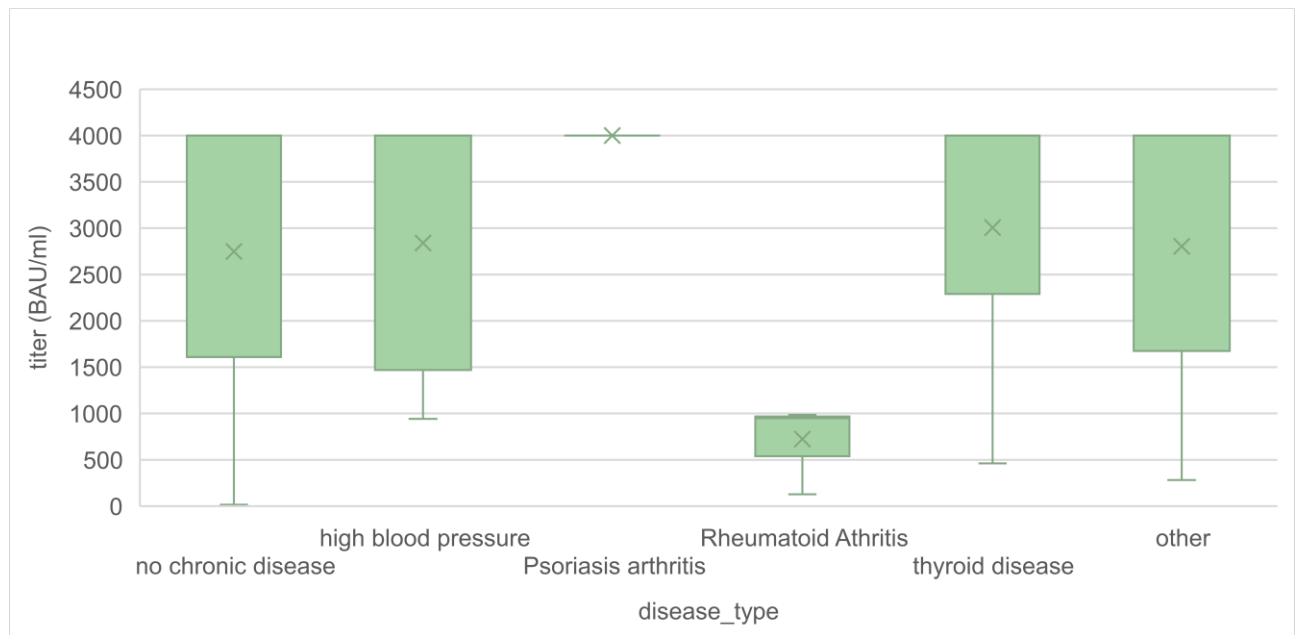

**Figure S5.** Antibody titer (BAU/ml) of the various disease types within the 3x vaccinated and convalescent group.

**Table S3** Pairwise comparison of chronic diseases in the 3x vaccinated and convalescent group.

|                                          | Sig.  | Corrected. Sig.* |
|------------------------------------------|-------|------------------|
| rheumatoid arthritis-no chronic disease  | 0.010 | 0.144            |
| rheumatoid arthritis-other               | 0.008 | 0.119            |
| rheumatoid arthritis-high blood pressure | 0.004 | 0.055            |
| rheumatoid arthritis-thyroid disease     | 0.002 | 0.034            |
| rheumatoid arthritis-psoriasis arthritis | 0.034 | 0.509            |
| no chronic disease-other                 | 0.992 | 1.000            |
| no chronic disease-high blood pressure   | 0.327 | 1.000            |
| no chronic disease-thyroid disease       | 0.168 | 1.000            |
| no chronic disease-psoriasis arthritis   | 0.367 | 1.000            |
| other-high blood pressure                | 0.259 | 1.000            |
| other-thyroid disease                    | 0.081 | 1.000            |
| other-psoriasis arthritis                | 0.364 | 1.000            |
| high blood pressure-thyroid disease      | 0.888 | 1.000            |
| high blood pressure-psoriasis arthritis  | 0.518 | 1.000            |
| thyroid disease-psoriasis arthritis      | 0.538 | 1.000            |

\* after Bonferroni correction
